# Supplementary material for: The downward spiral of mental disorders and educational attainment: a systematic review on early school leaving
Source: PubMed Central journal article supplement (PMC4244046; doi:10.1186/s12888-014-0237-4), 2014-08-27
Supplement: 12888_2014_237_MOESM1_ESM.pdf [file 12888_2014_237_MOESM1_ESM.pdf]

**Additional file 1 Included references (mental disorders as predictor of school dropout)**

| Reference                                    | Study design                                                                                        | Sample<br>N, age range, gender                                         | Dropout definition<br>HS: High school<br>GED: General Educational<br>Development                                           | Hypotheses                                                                                                                           | Disorder types                                                                                                                                    | Evaluation of disorders                                                                                                                                                                                                  | Confounding factors                                                                                                                                                                         | Significant results<br>ORadj: adjusted odds ratio<br>CI: confidence interval<br>RR: relative risk                                                                                                                                                                                                                                                                                                                                                                                                                                                                                                                                        | Overall risk of bias<br>(for details, see<br>additional file 4) |
|----------------------------------------------|-----------------------------------------------------------------------------------------------------|------------------------------------------------------------------------|----------------------------------------------------------------------------------------------------------------------------|--------------------------------------------------------------------------------------------------------------------------------------|---------------------------------------------------------------------------------------------------------------------------------------------------|--------------------------------------------------------------------------------------------------------------------------------------------------------------------------------------------------------------------------|---------------------------------------------------------------------------------------------------------------------------------------------------------------------------------------------|------------------------------------------------------------------------------------------------------------------------------------------------------------------------------------------------------------------------------------------------------------------------------------------------------------------------------------------------------------------------------------------------------------------------------------------------------------------------------------------------------------------------------------------------------------------------------------------------------------------------------------------|-----------------------------------------------------------------|
| Hemphälä & Hodgins<br>2014<br>Sweden         | longitudinal, 1 wave                                                                                | N=147<br><br>mean age at wave 1: 16.8 years<br><br>61 male & 86 female | Having less than 7 years<br>of education                                                                                   | Conduct disorder symptoms prior to age 15<br>-> school dropout                                                                       | Conduct disorder                                                                                                                                  | Psychopathy Checklist -<br>Youth Version (PCL-YV)<br><br>Schedule for Affective Disorders<br>and Schizophrenia for school-<br>aged children (K-SADS)<br><br>Structured Clinical Interview for<br>DSM IV disorders (SCID) | not applied                                                                                                                                                                                 | Conduct disorder symptoms were significantly associated<br>with school dropout (ORadj=1.35 (95%CI:1.08-1.69),<br>p-value=0.009.                                                                                                                                                                                                                                                                                                                                                                                                                                                                                                          | unclear                                                         |
| Quiroga et al.<br>2013<br>Montreal, Canada   | longitudinal, 3 waves                                                                               | N=493<br><br>mean age: 12.5 years<br><br>265 male & 228 female         | Noncompletion of secondary<br>education                                                                                    | Depressive disorder -> academic<br>competence/achievement -> school dropout                                                          | Depressive disorder                                                                                                                               | Inventory to Diagnose<br>Depression (IDD)                                                                                                                                                                                | Gender<br>Parental education<br>Grade retention<br>Academic competence<br>Academic achievement                                                                                              | The results showed an indirect relationship between<br>depression and dropout through self-perceived academic<br>competence (standardized indirect coefficient=0.05),<br>indicating that the probability of dropping out of school was<br>5% higher each time that depression symptoms increased<br>by one standard deviation.                                                                                                                                                                                                                                                                                                           | unclear                                                         |
| Quiroga et al.<br>2012<br>Montreal, Canada   | longitudinal, 3 waves                                                                               | N=453<br><br>mean age: 12.5 years<br><br>52% male & 48% female         | Noncompletion of secondary<br>education                                                                                    | Grade retention -> depressive disorder -><br>school dropout                                                                          | Depressive disorder                                                                                                                               | Inventory to Diagnose<br>Depression (IDD)                                                                                                                                                                                | Gender<br>Parental education<br>Grade retention<br>Academic competence<br>Academic achievement<br>Anxiety<br>School rebelliousness<br>Friends school engagement<br>Student teacher conflict | Students who had repeated a grade in primary school were<br>5.54 times more likely to drop out (95%CI: 2.46-12.46).<br>Depression symptoms in the seventh grade were also<br>associated with a higher risk to drop out (ORadj=2.75, 95%CI:<br>1.18-6.42), p-value<0.01).<br>The likelihood of dropping out for students with a history of<br>grade retention who also reported depressive symptoms in<br>7th grade was 7.26 times higher than for those who did not<br>report depression (95%CI: 1.46-36.17, p-value<0.01). No<br>gender differences noted for the reported interplay.                                                   | high                                                            |
| McLeod <sup>15</sup><br>2012<br>USA          | longitudinal, 4 waves<br><br>National Longitudinal Study<br>of Adolescent Health<br>(NLSAH)         | N=6315<br><br>9-12th grade<br><br>46% male & 54% female                | Educational milestones:<br>HS dropout<br>GED<br>HS graduation<br>Technical training<br>College entry<br>College graduation | Mental disorders -> Educational attainment                                                                                           | Depressive disorder<br>Attention deficit disorder with/<br>without hyperactivity<br>Delinquency<br>Substance use                                  | Center for Epidemiological<br>Studies Depression Scale<br>(CES-DC)<br>SNAP-IV                                                                                                                                            | Age<br>Gender<br>Race<br>Socioeconomic status<br>Family structure<br>Grade Point Average (GPA)<br>Combination of mental health<br>problems<br>Academic aptitude                             | All 4 disorder categories were associated with receiving a<br>lower degree when considered alone.<br>When considering the results of the full model (including GPA)<br>the coefficients for delinquency and substance use were<br>reduced by about half, but remained significant, whereas the<br>coefficient for attention problems became marginally<br>insignificant (p-value 0.093).<br>Adolescents who experienced more than one mental health<br>problem generally achieved a lower degree than youth who<br>experienced only one problem.<br>Co-occurring attention problems heightened the risk of low<br>educational attainment | unclear                                                         |
| Borges et al.<br>2011<br>Mexico City, Mexico | cross-sectional                                                                                     | N=2362<br><br>18-65 years                                              | Noncompletion of secondary<br>education                                                                                    | Mental disorder -> school dropout                                                                                                    | Mood disorders<br>Anxiety disorders<br>Impulse control disorders<br>Substance use disorder                                                        | Composite International<br>Diagnostic Interview (CIDI)                                                                                                                                                                   | Childhood traumatic events<br>Childhood neglect<br>Parental mental illness<br>Family disruption<br>Low parental education<br>Age<br>Gender<br>Sociodemographic variables                    | Compared with having no disorder, generalized anxiety and<br>post-traumatic stress disorder significantly reduced the odds<br>for dropping out of highschool. In contrast, drug abuse and<br>dependence increased the odds for dropout.<br>The proportion of people dropping out of secondary school<br>would only decrease by 0.53% in the absence of mental<br>disorders, suggesting a strong impact of socioeconomic or<br>cultural adversities.                                                                                                                                                                                      | low                                                             |
| Porche et al. <sup>30</sup><br>2011<br>USA   | cross-sectional<br>retrospective<br><br>Collaborative Psychiatric<br>Epidemiological Surveys (CPES) | N=2532<br><br>21-29 years                                              | Noncompletion of HS                                                                                                        | Early childhood trauma -> Childhood<br>psychiatric disorders -> HS dropout<br><br>Mental health services use<br>-> School attendance | Major childhood trauma<br>Depressive disorder<br>Anxiety disorder<br>Post traumatic stress disorder<br>Substance use disorder<br>Conduct disorder | Composite International<br>Diagnostic Interview (CIDI)                                                                                                                                                                   | Gender<br>Race/ethnicity<br>Parental education level<br>Nativity<br>Early youth employment<br>Early pregnancy                                                                               | Substance use disorder (ORadj=2.48 CI=1.30-4.74) and<br>conduct disorder (ORadj=2.38 CI=1.43-3.96) were<br>significantly associated with HS dropout.<br>After adjusting for psychiatric disorders, the OR of<br>dropping out associated with childhood trauma was no<br>longer significant (ORadj=1.36 CI=0.98-1.89).<br>Services use was not considered a mediator<br>of the relation between childhood trauma and dropout<br>(ORadj=0.95 CI=0.57-1.59).                                                                                                                                                                                | unclear                                                         |

| Reference                                                       | Study design                                                                                                                                                                                                                                       | Sample<br>N, age range, gender                                                                                          | Dropout definition<br>HS: High school<br>GED: General Educational<br>Development              | Hypotheses                                                                                                     | Disorder types                                                                                                                                   | Evaluation of disorders                                                              | Confounding factors                                                                                                                                                                                                 | Significant results<br>ORadj: adjusted odds ratio<br>CI: confidence interval<br>RR: relative risk                                                                                                                                                                                                                                                                                                                                                                                                                                                                                                                                                                                                                                      | Overall risk of bias<br>(for details, see<br>additional file 4) |
|-----------------------------------------------------------------|----------------------------------------------------------------------------------------------------------------------------------------------------------------------------------------------------------------------------------------------------|-------------------------------------------------------------------------------------------------------------------------|-----------------------------------------------------------------------------------------------|----------------------------------------------------------------------------------------------------------------|--------------------------------------------------------------------------------------------------------------------------------------------------|--------------------------------------------------------------------------------------|---------------------------------------------------------------------------------------------------------------------------------------------------------------------------------------------------------------------|----------------------------------------------------------------------------------------------------------------------------------------------------------------------------------------------------------------------------------------------------------------------------------------------------------------------------------------------------------------------------------------------------------------------------------------------------------------------------------------------------------------------------------------------------------------------------------------------------------------------------------------------------------------------------------------------------------------------------------------|-----------------------------------------------------------------|
| Kent et al. <sup>27</sup><br>2011<br>Pittsburgh, USA            | case control study<br>case: ADHD diagnosis<br>control, no diagnosis<br>matching: age, gender, race,<br>parent education level<br><br>longitudinal, 4 waves<br>Pittsburgh ADHD Longitudinal<br>Study (PALS)                                         | N=539 (326 cases/213 controls)<br><br>mean age ADHD: 17.6 years<br>mean age control: 17.1 years<br><br><b>100% male</b> | Noncompletion of HS                                                                           | Attention Deficit Disorder with Hyperactivity<br>(ADHD) -> HS dropout                                          | Attention Deficit Disorder with<br>Hyperactivity (ADHD)<br>Oppositional Defiant Disorder<br>(ODD)<br>Conduct disorder (CD)                       | Childhood clinical evaluation<br>Disruptive Behavior Disorder<br>rating Scale (DBD)  | Parental education level<br>IQ                                                                                                                                                                                      | Adolescents with ADHD were significantly more likely<br>to drop out of HS than adolescents without ADHD<br>(ORadj=8.14 p<0.01).<br>However, symptom severity of ADHD, ODD and CD for<br>adolescents with ADHD were not significant predictors<br>of dropout.                                                                                                                                                                                                                                                                                                                                                                                                                                                                           | high                                                            |
| Breslau et al. <sup>31</sup><br>2010<br>USA                     | longitudinal, 2 waves<br><br>National Epidemiological Survey<br>of Alcohol and Related Conditions<br>(NESARC)                                                                                                                                      | N=29662<br><br>≥ 18 years<br>48% male & 52% female                                                                      | Noncompletion of HS on<br>time<br>Only attaining GED or<br>Late HS graduation<br>(≥ 19 years) | Early onset psychiatric disorder -><br>Failure to complete HS on time                                          | Mood disorder<br>Anxiety disorder<br>Conduct disorder<br>Attention Deficit Disorder with<br>Hyperactivity (ADHD)<br>Substance use disorder (SUD) | Alcohol Use Disorders and<br>Associated Disabilities<br>Interview Schedule (AUDADIS) | Childhood adversities<br>Age<br>Gender<br>Nativity<br>Region of the US<br>Race/ethnicity                                                                                                                            | Adjusting for childhood adversities, socio-demographic<br>variables and co-occurring disorders, only conduct<br>disorder (ORadj=1.89 CI=1.57-2.28) and all 3 types of<br>ADHD were significantly associated with noncompletion of<br>HS on time. Among ADHD types, the association was<br>strongest for the combined type (ORadj=2.06 CI=1.66-2.56).<br><br>Among substance use disorders, nicotine dependence<br>(ORadj=1.52 CI=1.13-2.03) and drug use or dependence<br>(ORadj=1.34 CI=1.11-1.62) were significantly associated with<br>HS failure. No association between alcohol and HS failure.                                                                                                                                   | low                                                             |
| LeCook et al. <sup>33</sup><br>2010<br>USA                      | cross-sectional<br>retrospective<br><br>Collaborative Psychiatric<br>Epidemiological Surveys (CPES)                                                                                                                                                | N=5839<br><br>≥ 18 years                                                                                                | Noncompletion of HS                                                                           | Early onset psychiatric disorder -><br>HS dropout<br>with a variation of the association by race/<br>ethnicity | not reported                                                                                                                                     | Composite International<br>Diagnostic Interview (CIDI)                               | Age<br>Gender<br>Marital status                                                                                                                                                                                     | Individuals with early onset psychiatric disorders were<br>more likely to have less than a HS education. After<br>adjustment, Latinos (40%) and Blacks (31%) were more<br>likely than Whites (15%) to drop out.                                                                                                                                                                                                                                                                                                                                                                                                                                                                                                                        | unclear                                                         |
| McCaffrey et al. <sup>43</sup><br>2010<br>South Dakota, USA     | longitudinal, 6 waves<br><br>ALERT & ALERT Plus<br>(Drug prevention programs)                                                                                                                                                                      | N=4375<br><br>mean age: 12.36 years<br>50% male & 50% female                                                            | Noncompletion of HS                                                                           | Heavy & persistent marijuana use in<br>grades 9 and 10 -> Cognitive impairment<br>-> HS dropout                | Heavy & persistent marijuana<br>use                                                                                                              | use of marijuana in the past<br>month and 3 or more times<br>in that period          | Age<br>Gender<br>Race/ethnicity<br>Family structure<br>Parental education level<br><br>School performance<br>Deviant behavior<br>Attitudes school & family<br>Family influences<br>Peer influences<br>Substance use | Controlling for socio-demographic covariates, the odds of<br>HS dropout are 2.4 times higher for marijuana users<br>compared to nonusers. This association does not change<br>significantly after considering alcohol consumption.<br>But after introducing cigarettes in the model, marijuana use<br>is no longer significantly related to HS dropout, suggesting<br>an omitted variable bias.<br>In contrast to the hypothesis, school performance did not<br>mediate the association between marijuana use and<br>dropout, but family and peer influence did.                                                                                                                                                                       | unclear                                                         |
| Honwood et al. <sup>28</sup><br>2010<br>Australia & New Zealand | Meta-analysis of 3<br>birth cohort studies<br><br>Christchurch Health and<br>Development Study (CHDS)<br><br>Victoria Adolescent Health<br>Cohort Study (VAHCS)<br><br>Mater-University of Queensland<br>Study of Pregnancy and<br>Outcomes (MUSP) | N1=1003-1025 (cohort CHDS)<br>N2=1523 (cohort VAHCS)<br>N3=3768 (cohort MUSP)                                           | Noncompletion of HS                                                                           | Early onset cannabis use -> HS<br>dropout                                                                      | Cannabis use                                                                                                                                     | Age of first use:<br><15 years<br>15-17 years<br>never used before age 18            | Family socio-demographic<br>background<br>Child cognitive ability<br>Family functioning<br>Child/early adolescent<br>behavioural adjustment                                                                         | The pooled estimate of the adjusted ORs showed that<br>compared to those who began cannabis use <15 years,<br>those who began at age 15-17 were 1.7 times more<br>likely to complete HS (ORadj=1.7 CI=1.4-2.1, p<0.001),<br>whereas those who had never used cannabis by age 18<br>had an adjusted OR of 2.9 (CI=1.8-4.6 p<0.001).<br>However, there was evidence of significant heterogeneity<br>of parameter estimates (Cochran's Q(2df)=6.22, p=0.04)<br>reflecting a more modest association for VAHCS.<br>There was no significant gender x age of onset<br>interaction for HS completion.<br>The pooled estimate suggested that the early use of<br>cannabis accounted for 17% of the overall rate of HS<br>noncompletion (PAR). | low                                                             |

| Reference                                                   | Study design                                                                                                                     | Sample<br>N, age range, gender                                                                                                                      | Dropout definition<br>HS: High school<br>GED: General Educational<br>Development                                                                                                    | Hypotheses                                                                         | Disorder types                                                                                                                                                              | Evaluation of disorders                                                                                                                                            | Confounding factors                                                                                                   | Significant results<br>ORadj: adjusted odds ratio<br>CI: confidence interval<br>RR: relative risk                                                                                                                                                                                                                                                                                                                                                                                                                                                                                                                                                                                                                                                                                                                                       | Overall risk of bias<br>(for details, see<br>additional file 4) |
|-------------------------------------------------------------|----------------------------------------------------------------------------------------------------------------------------------|-----------------------------------------------------------------------------------------------------------------------------------------------------|-------------------------------------------------------------------------------------------------------------------------------------------------------------------------------------|------------------------------------------------------------------------------------|-----------------------------------------------------------------------------------------------------------------------------------------------------------------------------|--------------------------------------------------------------------------------------------------------------------------------------------------------------------|-----------------------------------------------------------------------------------------------------------------------|-----------------------------------------------------------------------------------------------------------------------------------------------------------------------------------------------------------------------------------------------------------------------------------------------------------------------------------------------------------------------------------------------------------------------------------------------------------------------------------------------------------------------------------------------------------------------------------------------------------------------------------------------------------------------------------------------------------------------------------------------------------------------------------------------------------------------------------------|-----------------------------------------------------------------|
| Goulding et al. <sup>48</sup><br>2010<br>Atlanta, USA       | cross-sectional<br><br>Atlanta Cohort on the Early<br>Course of Schizophrenia (ACES)                                             | N=109<br><br>18-39 years (mean: 23.1 years)<br><br>76% male & 24% female<br><br><b>clinical sample</b>                                              | Noncompletion of HS                                                                                                                                                                 | Schizophrenia spectrum disorder -><br>HS dropout <-> Social and clinical variables | Episode of nonaffective psychosis<br><br>Daily nicotine use<br>Weekly alcohol use<br>Daily cannabis use                                                                     | Structured Clinical Interview for<br>DSM Disorders - Axis I (SCID)                                                                                                 | not applied                                                                                                           | 44% of participants had dropped out of HS which is much<br>higher than in a non-clinical sample (rates of 13-18%).<br>The 2 most common diagnoses for school dropouts were<br>schizophrenia, paranoid type (45.8%) and schizophreniform<br>disorder (18.8%). HS dropouts were significantly younger<br>at time of hospitalisation than HS graduates.<br>HS dropout was significantly associated with daily nicotine<br>use, daily cannabis use, poorer academic performance<br>and poorer overall social functioning.                                                                                                                                                                                                                                                                                                                   | unclear                                                         |
| Marti et al. <sup>62</sup><br>2010<br>USA                   | longitudinal, 8 waves                                                                                                            | N=496<br><br>mean age: 13.5 years<br><br><b>100% female</b>                                                                                         | Having dropped out prior to<br>age 18                                                                                                                                               | Polysubstance use -> School dropout                                                | Polysubstance abuse symptoms<br>Polysubstance abuse diagnosis<br>Polysubstance: tobacco, alcohol,<br>cannabis, stimulants, downers,<br>inhalants and hallucinogens          | Schedule for Affective Disorders<br>and Schizophrenia for school-<br>aged children (K-SADS)<br><i>Child Behavior Checklist(CBCL)</i><br><i>Externalizing Scale</i> | not applied                                                                                                           | Among early heavy substance users, 31.4% had dropped<br>out of school. Problematic use (OR=5.33 p<0.001),<br>problematic abuse (OR=3.69 p<0.001), late-heavy<br>substance use (OR=4.45 p<0.01) and moderate escalating<br>use (OR=5.56 p<0.01) were significantly associated<br>with school dropout prior to age 20.                                                                                                                                                                                                                                                                                                                                                                                                                                                                                                                    | high                                                            |
| Legleye et al. <sup>24</sup><br>2010<br>Metropolitan France | cross-sectional                                                                                                                  | N=29393<br><br>age range: 17 years<br><br>51% male & 49% female                                                                                     | Having dropped out of school<br>at age 17                                                                                                                                           | Cannabis use -> School dropout                                                     | Polysubstance use (tobacco,<br>alcohol, cannabis, so-called rare<br>drugs as poppers, hallucinogenic<br>mushrooms, ecstasy, cocaine<br>amphetamines, crack, heroin,<br>LSD) | Age of onset<br><br>Age at the transition to daily<br>use                                                                                                          | Socioeconomic status<br>Parents' divorce/separation<br>Grade repetition                                               | Compared with lifetime abstinence, experimentation alone<br>before age 14 was not linked to school dropout whereas<br>experimentation at age 15-16 was associated with<br>school attainment (ORadj=-0.80 for boys and 0.64 for girls)<br>School dropout was more common when daily cannabis<br>use was reported early (<14 years) with an ORadj= 2.05<br>for boys and ORadj=3.41 for girls.<br>The daily consumption of tobacco had a major impact on<br>school dropout for both sexes (ORadj= 2.62 for boys and<br>2.92 for girls).<br>Experimentation alone with alcohol and cannabis during<br>school years enhanced school attainment compared<br>with total abstinence.                                                                                                                                                            | unclear                                                         |
| Lee et al. <sup>44</sup><br>2009                            | cross-sectional<br><br>World Mental Health Survey<br><br>7 low- and middle-income<br>(LAMI) countries<br>9 high-income countries | N=41688                                                                                                                                             | Noncompletion of one of the<br>educational milestones:<br><i>primary education</i><br><i>secondary education</i><br><i>entry to tertiary education</i><br><i>tertiary education</i> | Early onset mental disorder -> School<br>dropout                                   | Anxiety disorders<br>Mood disorders<br>Behaviour/impulse control disorder<br>Substance use disorder (SUD)                                                                   | Composite International<br>Diagnostic Interview (CIDI)                                                                                                             | Childhood adversities<br>Age<br>Sociodemographic variables<br>Dummy variables for countries'<br>income level          | Every disorder category was significantly related to non-<br>completion of secondary school in high-income countries:<br>Any anxiety disorder: ORadj=1.3 CI=1.2-1.4; p<0.01<br>Any mood disorder: ORadj=1.4 CI=1.2-1.6; p<0.01<br>Any impulse disorder: ORadj=2.2 CI=1.8-2.7; p<0.01<br>Any substance use disorder: ORadj=2.8 CI=2.3-3.3; p<0.01<br>Any mental disorder: ORadj=1.4 CI=1.3-1.5; p<0.01<br><br>In low-income countries, only mood disorders (ORadj=1.3<br>CI=1.0-1.6; p=0.03); impulse disorders (ORadj=1.3 CI=1.1-<br>1.6; p=0.01) and substance use disorders (ORadj=1.5<br>CI=1.1-2.1; p=0.02) were significantly related to dropout.<br><br>In both, LAMI and high-income countries, the impact of<br>any mental disorder on educational attainment was<br>strongest for the stage of completing secondary education. | unclear                                                         |
| Fletcher <sup>45</sup><br>2008<br>USA                       | longitudinal, 3 waves<br><br>National Longitudinal Study<br>of Adolescent Health<br>(NLSAH)                                      | N=13000<br><br>Grades 7-12<br>wave 1: mean age: 17 years<br>wave 2: mean age: 18 years<br>wave 3: mean age: 22 years<br><br>47% male and 53% female | Noncompletion of HS<br>Not entering college                                                                                                                                         | Adolescent depression -> HS<br>dropout                                             | Depressive disorder                                                                                                                                                         | Center for Epidemiological<br>Studies Depression Scale<br>(CES-D)                                                                                                  | Age<br>Gender<br>Grade Point Average (GPA)<br>Maternal education<br>Family income<br>Marital status<br>Ethnicity/race | No significant association between depression and<br>school dropout in males, but in females: depressed<br>girls were 3.5 percentage points less likely to graduate<br>from HS and 6 percentage points less likely to enroll in<br>college than non-depressed girls. The latter association<br>was even stronger for girls from relatively rich families.<br>Intact family structure, family income and maternal<br>education were positively related with college enrollment.<br><br>Wave 1 GPA was negatively related to depression,<br>reducing the odds of depression by nearly 40% for<br>each point increase in GPA.                                                                                                                                                                                                              | unclear                                                         |

| Reference                                                           | Study design                                                                                                          | Sample<br>N, age range, gender                                                                                                                             | Dropout definition<br>HS: High school<br>GED: General Educational<br>Development                                                                             | Hypotheses                                                                      | Disorder types                                                                                                                       | Evaluation of disorders                                                                                                                                                                                    | Confounding factors                                                                                                                                                       | Significant results<br>ORadj: adjusted odds ratio<br>CI: confidence interval<br>RR: relative risk                                                                                                                                                                                                                                                                                                                                                                                                                                                                                                                                                                                  | Overall risk of bias<br>(for details, see<br>additional file 4) |
|---------------------------------------------------------------------|-----------------------------------------------------------------------------------------------------------------------|------------------------------------------------------------------------------------------------------------------------------------------------------------|--------------------------------------------------------------------------------------------------------------------------------------------------------------|---------------------------------------------------------------------------------|--------------------------------------------------------------------------------------------------------------------------------------|------------------------------------------------------------------------------------------------------------------------------------------------------------------------------------------------------------|---------------------------------------------------------------------------------------------------------------------------------------------------------------------------|------------------------------------------------------------------------------------------------------------------------------------------------------------------------------------------------------------------------------------------------------------------------------------------------------------------------------------------------------------------------------------------------------------------------------------------------------------------------------------------------------------------------------------------------------------------------------------------------------------------------------------------------------------------------------------|-----------------------------------------------------------------|
| Breslau et al. <sup>32</sup><br>2008<br>USA                         | longitudinal, 2 waves<br><br>National Comorbidity Survey<br>Replication (NCS-R)                                       | N=5692<br><br>≥ 18 years                                                                                                                                   | Noncompletion of one of the<br>educational milestones:<br><i>primary education</i><br><i>highschool</i><br><i>college entry</i><br><i>college graduation</i> | Early onset psychiatric disorder -><br>Failure to complete HS on time           | Anxiety disorders<br>Mood disorders<br>Impulse control disorder<br>Substance use disorder (SUD)                                      | Composite International<br>Diagnostic Interview (CIDI)                                                                                                                                                     | Childhood adversities<br>Age<br>Gender<br>Race/ethnicity                                                                                                                  | Compared to having no disorder, having exactly 1 disorder<br>is not significantly associated with higher odds of school<br>dropout, but having two (OR=1.4) or 3 (OR=3.5) disorders<br>is significantly associated with higher odds of dropout.<br>Of the 17 disorders considered, 12 were significantly<br>related to HS dropout.<br>Any anxiety disorder: ORadj=1.3 CI=1.0-1.5; p=0.02<br>Any mood disorder: ORadj=1.5 CI=1.1-1.9; p=0.003<br>Any impulse disorder: ORadj=1.8 CI=1.4-2.4; p<0.001<br>Any substance use disorder: ORadj=2.9 CI=2.1-4.0; p<0.001<br><br>The proportion of people dropping out of HS would<br>decrease by 10.2% in the absence of mental disorders. | low                                                             |
| Degenhardt et al.<br>2007<br>Victoria, Australia                    | longitudinal, 8 waves<br><br>Victoria Adolescent Health<br>Cohort                                                     | N=1520<br><br>wave 1: mean age: 14.9 years<br>wave 8: mean age: 24.1 years                                                                                 |                                                                                                                                                              | Adolescent amphetamine use -><br>Noncompletion of secondary<br>school (year 12) | Anxiety and depression symptoms<br>Amphetamine use<br>Cannabis and alcohol use<br>Tobacco use<br>Antisocial behaviour                | Self-reported measures for the<br>use of amphetamine, alcohol,<br>cannabis & tobacco                                                                                                                       | Gender<br>Parental smoking<br>Parental separation                                                                                                                         | Participants reporting symptoms of anxiety or depression<br>were at over twice the risk of concurrent amphetamine<br>use (ORadj=2.4 CI=1.7-3.4; p<0.001)<br>Frequent cannabis use increased the likelihood for<br>amphetamine use: OR=4.6 CI=2.2-10.0; p<0.001 for less<br>than weekly use and ORadj=27 CI=11.0-68.0; p<0.001 for<br>daily use.<br>Early-onset amphetamine users had higher rates of<br>school dropout: ORadj=2.7 CI=1.8-3.9; p<0.001<br>When adjusting for cannabis use, the association was<br>decreased: ORadjcann=1.6 CI=1.0-2.7; p=0.05<br>There was no evidence of effect modification by sex.                                                               | high                                                            |
| Bohon et al. <sup>41</sup><br>2007                                  | longitudinal, 7 waves                                                                                                 | N=240<br><br>46% male & 54% female                                                                                                                         | Noncompletion of HS                                                                                                                                          | Maternal depression -> HS Dropout                                               | Maternal Depression<br>Externalizing symptoms<br>Adolescent substance use<br>Adolescent depression                                   | Structured Clinical Interview for<br>DSM Disorders - Axis I (SCID)<br>Schedule for Affective Disorders<br>and Schizophrenia for school-<br>aged children (K-SADS)<br><i>Child Behavior Checklist(CBCL)</i> | Children's IQ<br>Mother's educational status<br>Socioeconomic status<br>Adol. externalizing symptoms<br>Adolescent substance use<br>Adolescent depression                 | Substance use before grade 9 (OR=2.97 p<0.001) and<br>externalizing behavior in grades 6-9 (OR= 1.05 p<0.05)<br>were significantly related to HS Dropout<br>A higher IQ was associated with lower odds of dropping<br>out for offspring of never or moderately depressed mothers<br>but not among offspring of mothers with chronic or<br>severe depression                                                                                                                                                                                                                                                                                                                        | low                                                             |
| Barbareis et al. <sup>26</sup><br>2007<br>Rochester, Minnesota, USA | case control, longitudinal<br><br>case: children with ADHD<br>control: children without ADHD<br>matching: age, gender | N=1110<br>370 cases & 740 controls<br><br>median age at last follow-up:<br>18.4 years for case and 18.3 for<br>controls<br><br>cases: 75% boys & 25% girls | Not graduating from HS, with r<br>ADHD -> HS dropout<br>or without pursuing a GED<br>or an adult diploma                                                     |                                                                                 | Attention Deficit Disorder with<br>Hyperactivity (ADHD)                                                                              | Incident ADHD diagnosis was<br>based on several steps<br>1. Review of school records<br>2. Review of medical records<br>3. ADHD questionnaire<br>4. Clinical diagnosis                                     | Matching criteria (age, gender)                                                                                                                                           | Among the remaining 301 AD/HD cases, 22.9% dropped<br>out of HS compared to 10.0% of the remaining 609 controls.<br>Participants with AD/HD were 2.7 times (CI=1.8-3.9;<br>p<0.001) more likely to drop out than controls, based on<br>an analysis adjusting for gender and year of birth.                                                                                                                                                                                                                                                                                                                                                                                         | low                                                             |
| Daniel et al. <sup>46</sup><br>2006<br>USA                          | longitudinal, 4 waves                                                                                                 | N=188<br><br>15.0-15.9 years; mean: 15.4<br><br>56% male & 44% female                                                                                      | Noncompletion of HS<br>Pursuing a GED<br>Receiving vocational training<br>Incarceration                                                                      | Suicidality -> School dropout                                                   | Major depressive disorder<br>Conduct disorder/Oppositional<br>defiant disorder<br>Substance use disorder (SUD)<br>Suicidal behaviors | Schedule for Affective Disorders<br>and Schizophrenia for school-<br>aged children (K-SADS)                                                                                                                | Age<br>Gender<br>Socioeconomic status<br>Race/ethnicity                                                                                                                   | Major depression (ORadj=3.38; p=0.04); conduct disorder<br>(ORadj=6.74; p=0.001) and reading status (ORadj=5.81;<br>p=0.002) were significantly related to school dropout.<br><br>Suicidality was strongly associated with school dropout<br>(ORadj=7.29; p<0.001). Similarly, dropout was related to<br>an increased incidence of suicidality (ORadj=11.03; p<0.001)                                                                                                                                                                                                                                                                                                              | unclear                                                         |
| Kogan et al. <sup>52</sup><br>2005<br>USA                           | longitudinal, 2 waves<br><br>Data from the National<br>Educational Longitudinal Study<br>(NELS)                       | N=1762<br><br>grade 8-12<br><br>49% male & 51% female<br><br><b>African American youth</b>                                                                 | Noncompletion of HS                                                                                                                                          | Substance use -> HS dropout                                                     | Alcohol use disorder<br>Marijuana use<br>Cigarette use                                                                               | Frequency of use during the<br>past 30 days for alcohol and<br>cannabis<br><br>Daily use for cigarettes                                                                                                    | Gender<br>Parenthood<br>Socioeconomic status<br>Time since dropout<br>Behavior problems in school<br>Academic problems<br>Conventional peers<br>Positive life orientation | 19% of the participants dropped out of school.<br>Youth who used marijuana at T1 were 1.6 times more likely<br>to drop out than were non-users. For each unit level of<br>increase in problem behaviour, youth were 2.1 times more<br>likely to drop out.<br>Dropout partially mediated the association between T1<br>problem behaviour and T2 substance use.                                                                                                                                                                                                                                                                                                                      | low                                                             |

| Reference                                                           | Study design                                                                      | Sample<br>N, age range, gender                                                                                      | Dropout definition<br>HS: High school<br>GED: General Educational<br>Development                                      | Hypotheses                                                                                                                                                           | Disorder types                                                                                           | Evaluation of disorders                                                                                                                                                    | Confounding factors                                                                                                                                                                                                                                                                     | Significant results<br>ORadj: adjusted odds ratio<br>CI: confidence interval<br>RR: relative risk                                                                                                                                                                                                                                                                                                                                                                                                        | Overall risk of bias<br>(for details, see<br>additional file 4) |
|---------------------------------------------------------------------|-----------------------------------------------------------------------------------|---------------------------------------------------------------------------------------------------------------------|-----------------------------------------------------------------------------------------------------------------------|----------------------------------------------------------------------------------------------------------------------------------------------------------------------|----------------------------------------------------------------------------------------------------------|----------------------------------------------------------------------------------------------------------------------------------------------------------------------------|-----------------------------------------------------------------------------------------------------------------------------------------------------------------------------------------------------------------------------------------------------------------------------------------|----------------------------------------------------------------------------------------------------------------------------------------------------------------------------------------------------------------------------------------------------------------------------------------------------------------------------------------------------------------------------------------------------------------------------------------------------------------------------------------------------------|-----------------------------------------------------------------|
| Meshane et al. <sup>57</sup><br>2004<br>Sydney, Australia           | longitudinal, 3 waves                                                             | N=117<br><br>12-21 years, mean age at follow-up: 16.2 years<br><br><b>clinic-referred sample for school refusal</b> |                                                                                                                       | Mental disorder -><br>Not attending a regular state<br>or fee-paying school 3 years later                                                                            | Anxiety disorder<br>Mood disorder                                                                        | <i>Child Behavior Checklist (CBCL)</i><br>Global Assessment of<br>Functioning (GAF)<br><br>Center for Epidemiological<br>Studies Depression Scale for<br>Children (CES-DC) | Gender<br>Hospitalization status<br>Age<br>Onset and duration of<br>school refusal<br>Number of school attended<br>Use of medication<br>Family composition<br>Family psychiatric history                                                                                                | After treatment for school refusal, 70% had improved occupational outcomes, with no differences between treatment status.<br>When all significant variables were entered in a logistic regression, major depression (ORadj=0.28; CI=0.11-0.70) and dysthymia (ORadj=0.26; CI=1.10-0.26; CI=0.10-0.67) were predictive of poor occupational outcomes at 6 months follow-up, but not at 3 years.<br>Social phobia (ORadj=0.17; CI=0.04-0.70) was the only predictor of poor outcomes at 3 years follow-up. | high                                                            |
| Fergusson et al. <sup>42</sup><br>2003<br>Christchurch, New Zealand | Birth cohort, 21 waves<br><br>Christchurch Health and<br>Development Study (CHDS) | N=1265<br><br>15-25 years<br><br>50% male & 50% female                                                              | HS Dropout: having left school by age 18 without achieving at least one pass grade in School Certificate examinations | Cannabis use -> HS dropout                                                                                                                                           | Frequency of cannabis use                                                                                |                                                                                                                                                                            | Socio-demographic factors<br>Changes of parents<br>Childhood adversities<br>Parental attachment<br>Parental adjustment<br>Childhood cognitive ability<br>Gender<br>Cigarette smoking<br>Novelty seeking<br>Deviant peer affiliations<br>Childhood behavior problems<br>Conduct problems | <i>Accumulative cannabis use -&gt; school dropout:</i><br>After adjustment for sign. confounding factors, people who had used cannabis on more than 100 times by age 16 had odds of HS dropout that were 3.7 (1.8-7.5; p<0.001) times higher those who had not used cannabis.                                                                                                                                                                                                                            | low                                                             |
| Ensminger et al.<br>2003<br>Chicago, USA                            | longitudinal, 4 waves<br><br>Woodlawn Study                                       | N=952<br><br>6-42 years<br><br><b>Urban African Americans</b>                                                       | Noncompletion of HS<br>(Having a GED is NOT<br>classified as dropout)                                                 | Mother's psychological distress -> Major depressive disorder of adult children<br><br>Mother's psychological distress -><br>Educational attainment of adult children | Major depressive disorder (MDD)                                                                          | Composite International<br>Diagnostic Interview (CIDI)                                                                                                                     | Poverty<br>Mother's education<br>Teen motherhood<br>High residential mobility<br>Family composition<br>Mother's physical health<br>Children's social adaptation<br>Children's psychological symptoms                                                                                    | Persistent maternal distress is significantly related to educational attainment for sons, but not for daughters (ORadj=2.29 CI=1.20-4.37; p<0.05) VS ORadj=1.12 CI=0.51-2.49).<br>Persistent maternal distress is also significantly related to MDD, but this time only for daughters (ORadj=2.63 CI=1.15-6.03; p<0.05).                                                                                                                                                                                 | high                                                            |
| Van Ameringen et al. <sup>47</sup><br>2003                          | cross-sectional<br>retrospective                                                  | N=201                                                                                                               | Noncompletion of HS                                                                                                   | Anxiety disorder -> School dropout                                                                                                                                   | Panic disorder/agoraphobia<br>Generalized social phobia                                                  | Structured Clinical Interview for<br>DSM Disorders - Axis I (SCID)<br>Beck Depression Inventory(BDI)<br>Fear Questionnaire<br>Sheehan Disability Scale (SDS)               | not applied                                                                                                                                                                                                                                                                             | Of the 201 patients, 52 (25.9%) did not complete HS and 98 (48.8%) left school prematurely (HS/college/university), diagnosis of GSP versus 46 of the 103 patients who did<br>There was a marginally significant association between                                                                                                                                                                                                                                                                     | unclear                                                         |
| Lynskey et al. <sup>63</sup><br>2003<br>Victoria, Australia         | longitudinal, 7 waves                                                             | N=1535<br><br>15-21 years                                                                                           | Noncompletion of secondary schooling (year 12)                                                                        | Regular cannabis use -> School dropout                                                                                                                               | Weekly cannabis use                                                                                      | Clinical Interview Schedule-<br>Revised (CIS-R)                                                                                                                            | Place of birth<br>Location of school<br>Parental separation<br>Parental education<br>Cigarette smoking<br>Alcohol consumption<br>Antisocial behavior<br>Psychiatric morbidity                                                                                                           | After controlling for potentially confounding factors, young people who reported weekly cannabis use were at increased risk for dropping out of school. In year 10, they were 5.6 (CI=2.0-15.0) times more likely to leave school than nonabusers and 2.2 times in year 11 whereas in year 12, the association was not significant (ORadj=1.1 CI=0.4-2.9).                                                                                                                                               | high                                                            |
| Vander Stoep et al. <sup>11</sup><br>2003<br>New York, USA          | longitudinal<br><br>Children in Community Study (CICS)                            | N=967<br><br>52% male & 48% female                                                                                  | Noncompletion of secondary school                                                                                     | Psychiatric disorder -> School dropout                                                                                                                               | Anxiety disorder<br>Depressive disorder<br>Substance abuse<br>Disruptive disorders                       |                                                                                                                                                                            | Socioeconomic status                                                                                                                                                                                                                                                                    | 43.8% of the failure to complete school could be attributed to psychiatric disorders. When controlling for socio-economic status, the proportion of school dropout attributable to psychiatric disorders was 44% in the lower SES stratum and 61% in the upper stratum.                                                                                                                                                                                                                                  | unclear                                                         |
| Ellickson et al. <sup>40</sup><br>2001<br>California, Oregon, USA   | longitudinal, 2 waves                                                             | N=4327<br><br>Grade 7-12<br><br>52% male & 48% female                                                               | Noncompletion of HS                                                                                                   | Early smoking in grade 7-> School dropout                                                                                                                            | Substance use disorder (SUD)<br><br>3 groups of early smoking:<br>nonsmokers<br>experimenters<br>smokers |                                                                                                                                                                            | Academic problems<br>Delinquency<br>Pregnancy                                                                                                                                                                                                                                           | Compared with nonsmokers, smokers by grade 7 were 5 times more likely to drop out of school at grade 12.<br>Compared with experimenters, smokers by grade 7 were twice as likely to drop out                                                                                                                                                                                                                                                                                                             | low                                                             |

| Reference                                                      | Study design                                                                                                                                                              | Sample<br>N, age range, gender                                                                                            | Dropout definition<br>HS: High school<br>GED: General Educational<br>Development                                                                                                                                      | Hypotheses                                         | Disorder types                                                                                                                                                                                                                                          | Evaluation of disorders                                                                            | Confounding factors                                                                                                                                                                           | Significant results<br>ORadj: adjusted odds ratio<br>CI: confidence interval<br>RR: relative risk                                                                                                                                                                                                                                                                                                                                                                                                                                                                                                       | Overall risk of bias<br>(for details, see<br>additional file 4) |
|----------------------------------------------------------------|---------------------------------------------------------------------------------------------------------------------------------------------------------------------------|---------------------------------------------------------------------------------------------------------------------------|-----------------------------------------------------------------------------------------------------------------------------------------------------------------------------------------------------------------------|----------------------------------------------------|---------------------------------------------------------------------------------------------------------------------------------------------------------------------------------------------------------------------------------------------------------|----------------------------------------------------------------------------------------------------|-----------------------------------------------------------------------------------------------------------------------------------------------------------------------------------------------|---------------------------------------------------------------------------------------------------------------------------------------------------------------------------------------------------------------------------------------------------------------------------------------------------------------------------------------------------------------------------------------------------------------------------------------------------------------------------------------------------------------------------------------------------------------------------------------------------------|-----------------------------------------------------------------|
| Bray et al. <sup>58</sup><br>2000<br>USA                       | longitudinal, 4 waves                                                                                                                                                     | N=1392 (at wave 4)<br>grades 6-11<br>51% male and 49% female                                                              | Non completion (dropout or<br>expulsion) of HS at age 16<br><br>Noncompletion of HS at age<br>17<br><br>Noncompletion of HS at age<br>18                                                                              | Marijuana initiation -> HS dropout                 | Substance use:<br>alcohol<br>cigarettes<br>marijuana<br>other illicit drugs (cocaine, crack,<br>hallucinogens, stimulants, sedatives,<br>inhalants)                                                                                                     | Initiation of use prior to age 16,<br>17 or 18                                                     | Parents' education<br>Household composition<br>Race<br>Gender<br>Rural VS urban school<br>Grades earned                                                                                       | Marijuana initiation was significantly related to HS dropout<br>for all ages, with an estimated association similar in<br>magnitude and corresponding to an odds ratio of 2.3.<br><br>When controlling for initiation of multiple substance use,<br>the association between marijuana use and HS dropout<br>was significant for ages 16 and 18 only.<br>Alcohol use was not significantly related to HS dropout<br>for all ages.<br>Cigarette initiation was significantly related for age 17 only.<br>The initiation of other drugs was insignificant in all models.                                   | high                                                            |
| Hansen et al. <sup>61</sup><br>1999<br>Pittsburgh, USA         | case control study, 4 waves<br><br>case: diagnosis of Attention<br>Deficit Disorder with hyperactivity<br>(ADHD) between ages 7-17<br><br>control: no psychiatric illness | N=36 (18 cases & 18 controls)<br><br>18-26 years<br>mean: 20.4 for ADHD<br>and 21.5 for controls)<br><br><b>100% male</b> | HS incompletion with or<br>without a GED                                                                                                                                                                              | ADHD -> School dropout                             | At wave 1:<br>conduct disorder<br>simple phobia<br>major depression<br>bipolar disorder<br>enuresis<br>social phobia<br>Tourette's disorder<br>Adjustment disorder<br>Sleep disorder<br>Oppositional Defiant Disorder                                   | Schedule for Affective Disorders<br>and Schizophrenia for school-<br>aged children (K-SADS)        | not applied                                                                                                                                                                                   | Controls were more likely to have graduated from HS (89%)<br>than ADHD subjects (56%) ( $\chi^2=3.46$ ; $p=0.63$ ) and ADHD<br>subjects were more likely to have attained a GED (28%<br>$\chi^2=3.2$ ; $p=0.088$ ) than controls (6%).<br>No significant difference between cases and controls<br>in occupational status.<br>ADHD subjects had more psychological difficulties in the<br>past 5 years than controls ( $\chi^2=6.84$ ; $p<0.01$ )                                                                                                                                                        | high                                                            |
| Miech et al. <sup>10</sup><br>1999<br>New Zealand              | longitudinal, 9 waves<br><br>Dunedin Study                                                                                                                                | N=901<br><br>15-21 years (study based on<br>waves 7 and 9)                                                                | Noncompletion of one of the<br>educational milestones:<br><i>No school certificate</i><br>(=national exam at age 16)<br><i>School certificate</i><br><i>Earning a HS degree</i><br><i>Entering tertiary education</i> | Mental disorders -> Educational attainment         | Anxiety disorder<br>Mood disorder<br>Antisocial disorder<br>Attention deficit disorder                                                                                                                                                                  | Diagnostic Interview Schedule<br>for Children (DISC)<br><br>Diagnostic Interview Schedule<br>(DIS) | Socioeconomic status<br>Gender<br>IQ<br>Academic ability<br>School involvement                                                                                                                | Internalizing disorders did not significantly affect educational<br>attainment in any of the models.<br>In contrast, conduct disorders were significantly associated<br>with failure to earn a HS degree (ORadj=3.35, $p$ -value<0.01<br>for DSM disorder diagnosis and ORadj=1.49, $p$ -value<0.01<br>for symptom assessment).<br>ADD was only significantly related to HS dropout when<br>evaluated in a dimensional format.<br>A priori no gender differences and no influence related to<br>comorbidity                                                                                             | low                                                             |
| Krohn et al. <sup>49</sup><br>1997<br>Rochester, New York, USA | longitudinal, 10 waves<br><br>Rochester Youth Development<br>Study                                                                                                        | N=775<br><br>13-21 years<br><br>73% male & 27% female                                                                     | Non completion of HS<br>by age 21                                                                                                                                                                                     | Early substance use -> School dropout              | Early substance use at wave 4<br>(alcohol, marijuana, crack, cocaine,<br>hallucinogens, heroin, inhalants,<br>tranquilizers, amphetamines,<br>barbiturates).<br>Later alcohol use at wave 10<br>Later substance use at wave 10<br>(other illicit drugs) | Frequency of use across the<br>first 4 waves                                                       | Peer use of alcohol & cannabis<br>Peer use of crack & hard drugs<br>Parental use of drugs & alcohol<br>Attachment to parents<br>Commitment to school<br>Social class/status<br>Race/ethnicity | After controlling for confounding factors, early substance<br>use was significantly related to school dropout for males,<br>but not for females.                                                                                                                                                                                                                                                                                                                                                                                                                                                        | low                                                             |
| Kessler et al. <sup>5</sup><br>1995<br>USA                     | cross-sectional<br><br>National Comorbidity Survey<br>(NCS)                                                                                                               | N=5877<br><br>15-54 years                                                                                                 | Noncompletion of one of the<br>educational milestones:<br><i>primary education</i><br><i>highschool</i><br><i>college entry</i><br><i>college graduation</i>                                                          | Psychiatric disorders -> Educational<br>attainment | Mood disorder<br>Anxiety disorder<br>Conduct disorder<br>Substance use disorder<br>(drug/alcohol abuse/dependence)                                                                                                                                      | Composite International<br>Diagnostic Interview (CIDI)                                             | Age<br>Grade in school<br>Socioeconomic status<br>Being raised in a female-headed<br>household<br>Number of siblings<br>Nativity<br>Urbanicity<br>Region of residence                         | All 4 types of disorders were significant predictors of<br>failure in all 3 educational transitions:<br><i>Noncompletion of HS:</i><br>Anxiety: OR=1.4 CI=1.1-1.8; $p<0.05$<br>Mood: OR=1.5 CI=1.1-1.9; $p<0.05$<br>Substance use: OR=2.3 CI=1.8-3.1; $p<0.05$<br>Conduct: OR=2.4 CI=1.8-3.2; $p<0.05$<br><br>There was also a clear "dose-response" relationship<br>between the number of prior disorders and dropping out of<br>HS.<br><br>Conduct disorders were the most impeding among males<br>for all 3 educational transitions whereas anxiety disorders<br>were the most impeding for females. | low                                                             |
