# Supplementary material for: The downward spiral of mental disorders and educational attainment: a systematic review on early school leaving
Source: PubMed Central journal article supplement (PMC4244046; doi:10.1186/s12888-014-0237-4), 2014-08-27
Supplement: 12888_2014_237_MOESM4_ESM.pdf [file 12888_2014_237_MOESM4_ESM.pdf]

Additional file 4 - Checklist summarising compliance with MOOSE guidelines, applied to Horwood et al., 2010

|                                                                                                                                                                                                                                                                              |     |
|------------------------------------------------------------------------------------------------------------------------------------------------------------------------------------------------------------------------------------------------------------------------------|-----|
| <b>Reporting background should include</b>                                                                                                                                                                                                                                   |     |
| Problem definition                                                                                                                                                                                                                                                           | Yes |
| Hypothesis statement                                                                                                                                                                                                                                                         | Yes |
| Description                                                                                                                                                                                                                                                                  | Yes |
| Type of exposure or intervention used                                                                                                                                                                                                                                        | Yes |
| Type of study designs used                                                                                                                                                                                                                                                   | Yes |
| Study population                                                                                                                                                                                                                                                             | Yes |
| <b>Reporting methods should include</b>                                                                                                                                                                                                                                      |     |
| Description of relevance or appropriateness of studies assembled for assessing the hypothesis to be tested                                                                                                                                                                   | Yes |
| Rationale for the selection and coding of data (eg, sound clinical principles or convenience)                                                                                                                                                                                | Yes |
| Documentation of how data were classified and coded (eg, multiple raters, blinding, and interrater reliability)                                                                                                                                                              | No  |
| Assessment of confounding (eg, comparability of cases and controls in studies where appropriate)                                                                                                                                                                             | Yes |
| Assessment of study quality, including blinding of quality assessors; stratification or regression on possible predictors of study results                                                                                                                                   | Yes |
| Assessment of heterogeneity                                                                                                                                                                                                                                                  | Yes |
| Description of statistical methods (eg, complete description of fixed or random effects models, justification of whether the chosen models account for predictors of study results, dose-response models, or cumulative meta-analysis) in sufficient detail to be replicated | Yes |
| Provision of appropriate tables and graphics                                                                                                                                                                                                                                 | Yes |
| <b>Reporting of results should include</b>                                                                                                                                                                                                                                   |     |
| Graphic summarizing individual study estimates and overall estimate                                                                                                                                                                                                          | Yes |
| Table giving descriptive information for each study included                                                                                                                                                                                                                 | Yes |
| Results of sensitivity testing (eg, subgroup analysis)                                                                                                                                                                                                                       | Yes |
| Indication of statistical uncertainty of findings                                                                                                                                                                                                                            | Yes |
| <b>Reporting of discussion should include</b>                                                                                                                                                                                                                                |     |
| Quantitative assessment of bias (eg, publication bias)                                                                                                                                                                                                                       | NA  |
| Justification for exclusion (eg, exclusion of non-English-language citations)                                                                                                                                                                                                | NA  |
| Assessment of quality of included studies                                                                                                                                                                                                                                    | Yes |
| <b>Reporting of conclusions should include</b>                                                                                                                                                                                                                               |     |
| Consideration of alternative explanations for observed results                                                                                                                                                                                                               | Yes |
| Generalization of the conclusions (ie, appropriate for the data presented and within the domain of the literature review)                                                                                                                                                    | Yes |
| Guidelines for future research                                                                                                                                                                                                                                               | Yes |
| Disclosure of funding source                                                                                                                                                                                                                                                 | Yes |

NA: not applicable

Overall risk bias: low
