# Supplementary material for: The downward spiral of mental disorders and educational attainment: a systematic review on early school leaving
Source: PubMed Central journal article supplement (PMC4244046; doi:10.1186/s12888-014-0237-4), 2014-08-27
Supplement: 12888_2014_237_MOESM5_ESM.pdf [file 12888_2014_237_MOESM5_ESM.pdf]

### Additional file 5 Risk of bias for all included studies (n=51)

For reference number please see reference list in manuscript.

– high risk of bias

+ low risk of bias

? risk of bias unclear

| <b>Mental disorders as a predictor of school dropout</b><br>(Studies investigating both sides of the mental health – dropout association are marked with *) |      |                |                |                |                |             |                                                        |                                                                                                                                                                                                                           |
|-------------------------------------------------------------------------------------------------------------------------------------------------------------|------|----------------|----------------|----------------|----------------|-------------|--------------------------------------------------------|---------------------------------------------------------------------------------------------------------------------------------------------------------------------------------------------------------------------------|
| First author<br>(reference)                                                                                                                                 | Year | Selection bias | Detection bias | Attrition bias | Reporting bias | Confounding | Overall risk of bias (without considering confounding) | Comments                                                                                                                                                                                                                  |
| Hemphälä                                                                                                                                                    | 2014 | ?              | +              | +              | +              | –           | unclear                                                | Small sample, no information about representativeness<br>Loss to follow-up: 18%, not differential<br>No confounding                                                                                                       |
| Quiroga                                                                                                                                                     | 2013 | +              | +              | ?              | +              | +           | unclear                                                | Particular sample of at-risk students, limited generalization<br>Non-response rate of 18%, no information about differences between respondents and nonrespondents<br>Control for sociodemographic and academic variables |
| Quiroga                                                                                                                                                     | 2012 | +              | +              | –              | +              | +           | high                                                   | Particular sample of at-risk students, limited generalization<br>Differential loss to follow-up of 24.8% in 1 years: non-respondents were more likely to drop out<br>Control for sociodemographic and academic variables  |
| McLeod                                                                                                                                                      | 2012 | +              | +              | ?              | +              | +           | unclear                                                | No information about attrition, appendices are not available<br>Control for sociodemographic, family and academic variables                                                                                               |

| First author (reference) | Year | Selection bias | Detection bias | Attrition bias | Reporting bias | Confounding | Overall risk of bias | Comments                                                                                                                                                                                                                                                                                                                                                           |
|--------------------------|------|----------------|----------------|----------------|----------------|-------------|----------------------|--------------------------------------------------------------------------------------------------------------------------------------------------------------------------------------------------------------------------------------------------------------------------------------------------------------------------------------------------------------------|
| Borges                   | 2011 | +              | +              | +              | ?              | +           | low                  | Stratified multistage probability sample, representative<br>Response rate of 76.6%, weighting to avoid differential loss<br>No clear indication whether results present crude or adjusted odds ratios<br>Control for sociodemographic and family variables                                                                                                         |
| Porche                   | 2011 | +              | +              | ?              | +              | -           | unclear              | Low risk of recall bias despite efforts to use valid methods<br>No information about reponse rate<br>Control for psychiatric morbidity, service use and sociodemographic variables only                                                                                                                                                                            |
| Kent                     | 2011 | +              | ?              | -              | +              | -           | high                 | Matching not taken into account in statistical analyses?<br>Loss to follow-up: 29.5% (364 participants out of 516)<br>Higher conduct disorder symptom rating for non-participants<br>Control for parental education and IQ                                                                                                                                         |
| Breslau                  | 2010 | +              | +              | +              | +              | +           | low                  | Low risk of recall bias despite efforts to use valid methods<br>Loss of 30% for longer term follow-up (> 1 year)<br>Control for sociodemographic and family variables (childhood adversities)                                                                                                                                                                      |
| LeCook                   | 2010 | +              | ?              | +              | +              | -           | unclear              | No information about considered disorder categories<br>Weighted response rates between 65.6% and 75.5%<br>Control for sociodemographic variables only                                                                                                                                                                                                              |
| McCaffrey                | 2010 | +              | ?              | +              | +              | +           | unclear              | Unknown risk of detection bias regarding self-reported drug use given the discrepancies regarding dropout information (self-report versus school-based)<br>Follow-up response rates of 91%, 87% and 83%<br>Attrition handled by propensity score-based nonresponse weights, missing data imputation<br>Control for sociodemographic, academic and family variables |

| First author (reference) | Year | Selection bias<br>Detection bias<br>Attrition bias<br>Reporting bias<br>Confounding | Overall risk of bias | Comments                                                                                                                                                                                                                                                                     |
|--------------------------|------|-------------------------------------------------------------------------------------|----------------------|------------------------------------------------------------------------------------------------------------------------------------------------------------------------------------------------------------------------------------------------------------------------------|
| Horwood                  | 2010 | Meta-analysis evaluated according to MOOSE                                          | low                  | Cf. additional file 5 for checklist of MOOSE criteria (Stroup et al. 2008)                                                                                                                                                                                                   |
| Goulding                 | 2010 | ? + ? ? -                                                                           | unclear              | Prevalence estimates would need an evaluation of sample representativeness<br>No information about response rate<br>Descriptive statistics only, no control for confounding                                                                                                  |
| Marti                    | 2010 | + + - + -                                                                           | high                 | Low risk of detection bias regarding self-reported drug use<br>Considerable loss to follow-up: 44%<br>No control for confounding                                                                                                                                             |
| Legleye                  | 2010 | ? + + + +                                                                           | unclear              | No information about inclusion/exclusion criteria<br>Low risk of detection bias regarding self-reported drug use<br>Response rate of 98%<br>Control for family and academic variables                                                                                        |
| Lee                      | 2009 | ? + + + +                                                                           | unclear              | Weighted response rate of 70.8%, but potentially differential nonresponse regarding mental disorders<br>Low risk of detection bias regarding self-reported data<br>Control for sociodemographic and family variables (childhood adversities)                                 |
| Fletcher                 | 2008 | ? + + + +                                                                           | unclear              | No indication on inclusion/exclusion criteria, representativeness<br>Small but differential loss to follow-up (10% after imputation for mother education and family income), shown in appendix table<br>Control for sociodemographic, family and academic variables          |
| Breslau                  | 2008 | + + + + +                                                                           | low                  | Low risk of recall bias despite efforts to use valid methods<br>No control for co-occurring disorders, but cluster analyses<br>Response rate of 70.9%, non-respondents may be more likely to have psychiatric disorders<br>Control for sociodemographic and family variables |

| First author (reference) | Year | Selection bias | Detection bias | Attrition bias | Reporting bias | Confounding | Overall risk of bias | Comments                                                                                                                                                                                                                                                              |
|--------------------------|------|----------------|----------------|----------------|----------------|-------------|----------------------|-----------------------------------------------------------------------------------------------------------------------------------------------------------------------------------------------------------------------------------------------------------------------|
| Degenhardt               | 2007 | ?              | +              | -              | +              | -           | high                 | No indication on inclusion/exclusion criteria, representativeness<br>Low risk of detection bias regarding self-reported data<br>Differential loss to follow-up (25%): males and smokers were overrepresented in wave 8<br>Control for sociodemographic variables only |
| Bohon                    | 2007 | +              | +              | +              | +              | -           | low                  | Blinding of interviewers, low risk of detection bias regarding self-reported data<br>Loss to follow-up: 19%, no differential attrition<br>Control for IQ, maternal education and adolescent behaviour problems                                                        |
| Barbareasi               | 2007 | +              | +              | +              | +              | -           | low                  | Inclusion/exclusion criteria well defined<br>Data from school and medical records<br>Outcome results based on case-control design<br>Control for matching variables (age, gender) only                                                                                |
| Daniel *                 | 2006 | ?              | +              | +              | +              | -           | unclear              | No information about representativeness, small sample<br>Small loss to follow-up: 7%<br>Control for sociodemographic variables and psychiatric morbidity                                                                                                              |
| Kogan *                  | 2005 | +              | +              | +              | +              | +           | low                  | Small but differential loss to follow-up (9%): non-participants were more likely to have dropped out, be male, smoke and have behavior problems<br>Control for sociodemographic and school-related variables                                                          |
| McShane                  | 2004 | +              | +              | -              | +              | +           | high                 | Clinical sample<br>High and differential loss to follow-up (39%)<br>Control for sociodemographic, family and school-related variables                                                                                                                                 |
| Fergusson *              | 2003 | +              | +              | +              | +              | +           | low                  | Loss to follow up (28-31%), weighting of data by the inverse of the probability of sample inclusion<br>Control for sociodemographic, academic and family variables                                                                                                    |

| First author (reference) | Year | Selection bias | Detection bias | Attrition bias | Reporting bias | Confounding | Overall risk of bias | Comments                                                                                                                                                                                                                                                                                                                                                                                                                             |
|--------------------------|------|----------------|----------------|----------------|----------------|-------------|----------------------|--------------------------------------------------------------------------------------------------------------------------------------------------------------------------------------------------------------------------------------------------------------------------------------------------------------------------------------------------------------------------------------------------------------------------------------|
| Ensminger                | 2003 | +              | ?              | -              | +              | -           | high                 | Study population drawn from a specific community, dependent and confounding variables measured in 1966-1967<br>Maternal distress evaluation based on two simple questions<br>Differential loss to follow-up (23%): non-participants more likely to be poor and less likely to be living with both parents<br>Control for sociodemographic variables, mother's physical illness, child's social adjustment and psychological symptoms |
| Van Ameringen            | 2003 | ?              | ?              | ?              | ?              | -           | unclear              | Small clinical sample with specific characteristics, exclusion criteria were unclear<br>Potential recall bias<br>No information about response rate<br>Descriptive statistics, unclear percentages (cumulative?)<br>Descriptive statistics, no control for confounding                                                                                                                                                               |
| Lynskey                  | 2003 | +              | +              | -              | +              | -           | high                 | Low risk of detection bias regarding self-reported data<br>Differential loss to follow-up (21%): non-participants were more likely to be male, to have separated parents or parents with lower education<br>Control for sociodemographic, smoking and psychiatric morbidity                                                                                                                                                          |
| Van der Stoep            | 2003 | ?              | +              | ?              | ?              | -           | unclear              | No information about inclusion/exclusion criteria, non-response rate or representativeness (the title refers to US population while representativeness of the sample is compromised)<br>No information about attrition, control for socioeconomic status                                                                                                                                                                             |
| Ellickson                | 2001 | +              | +              | +              | +              | +           | low                  | Self-reported smoking was cross-checked with saliva sample<br>Differential loss to follow-up (33%), but the sample was weighted to reduce bias by 90%<br>Control for sociodemographic and family variables                                                                                                                                                                                                                           |

| First author (reference) | Year | Selection bias | Detection bias | Attrition bias | Reporting bias | Confounding | Overall risk of bias | Comments                                                                                                                                                                                                                                                                                      |
|--------------------------|------|----------------|----------------|----------------|----------------|-------------|----------------------|-----------------------------------------------------------------------------------------------------------------------------------------------------------------------------------------------------------------------------------------------------------------------------------------------|
| Bray                     | 2000 | ?              | +              | -              | +              | +           | high                 | Response rate and representativeness unclear<br>Low risk of detection bias regarding self-reported data<br>Loss to follow-up: 45%, compensated by a stratified random cross-sectional sample to be included for final analyses<br>Control for sociodemographic, family and academic variables |
| Hansen                   | 1999 | -              | +              | -              | +              | -           | high                 | Variables measured in mid until late 80s, very small sample (n=36)<br>Differential loss to follow-up (44%) for ADHD group<br>Descriptive statistics, no control for potential confounding                                                                                                     |
| Miech *                  | 1999 | +              | +              | +              | +              | +           | low                  | Birth cohort, 9 waves<br>Categorical and dimensional assessment of mental disorders<br>Loss to follow-up: 9%<br>Control for sociodemographic and academic variables                                                                                                                           |
| Krohn *                  | 1997 | +              | +              | +              | +              | +           | low                  | Acceptable loss to follow-up (22%)<br>Control for sociodemographic, family and academic variables                                                                                                                                                                                             |
| Kessler                  | 1995 | +              | +              | +              | +              | +           | low                  | Low risk of recall bias despite efforts to use valid methods<br>Response rate of 82.4%, non-respondents may be more likely to have psychiatric disorders<br>Control for sociodemographic and academic variables                                                                               |

**School dropout as a predictor of mental disorders**

| <b>First author (reference)</b> | <b>Year</b> | <b>Selection bias</b> | <b>Detection bias</b> | <b>Attrition bias</b> | <b>Reporting bias</b> | <b>Confounding</b> | <b>Overall risk of bias</b> | <b>Comments</b>                                                                                                                                                                                                                             |
|---------------------------------|-------------|-----------------------|-----------------------|-----------------------|-----------------------|--------------------|-----------------------------|---------------------------------------------------------------------------------------------------------------------------------------------------------------------------------------------------------------------------------------------|
| Apantaku-Olajide                | 2014        | ?                     | +                     | ?                     | +                     | -                  | unclear                     | No information about representativeness of the sample<br>No information about differential attrition<br>Descriptive statistics, no control for potential confounding                                                                        |
| Ohayon                          | 2014        | +                     | +                     | ?                     | +                     | ?                  | unclear                     | No information about response rate<br>Univariate logistic regressions?                                                                                                                                                                      |
| Benjet                          | 2012        | +                     | +                     | +                     | +                     | -                  | low                         | Sample designed to be representative of Mexico City youth<br>Response rate of 71%, weighting of data to account for differential loss<br>Control for sociodemographic variables only                                                        |
| Lee                             | 2010        | +                     | +                     | ?                     | +                     | -                  | unclear                     | Unclear information about loss to follow-up<br>Control for psychiatric morbidity and family variables (8 risk factors were tested independently and simultaneously)                                                                         |
| Benjet                          | 2009        | +                     | +                     | ?                     | +                     | +                  | unclear                     | Unclear information about response rate: were non-participants different from participants?<br>Control for adolescent burden, sociodemographic and family variables                                                                         |
| Crosnoe                         | 2007        | +                     | +                     | +                     | +                     | +                  | low                         | Acceptable overall loss to follow-up: 23%<br>Differential attrition across waves and unequal probability of selection into the final sample were balanced by weighting<br>Control for sociodemographic, family and school-related variables |

| First author (reference) | Year | Selection bias | Detection bias | Attrition bias | Reporting bias | Confounding | Overall risk of bias | Comments                                                                                                                                                                                                                                                  |
|--------------------------|------|----------------|----------------|----------------|----------------|-------------|----------------------|-----------------------------------------------------------------------------------------------------------------------------------------------------------------------------------------------------------------------------------------------------------|
| Fothergill               | 2007 | ?              | +              | +              | +              | +           | unclear              | Study population drawn from a specific community, independent and confounding variables measured in 1966-1967<br>Acceptable but differential loss to follow-up (23%), however balanced by multiple imputation<br>Control for gender and mother's drug use |
| Williams                 | 2006 | +              | +              | ?              | +              | +           | unclear              | Differential nonresponse was compensated by weighting, however no detail provided<br>Control for sociodemographic and academic variables                                                                                                                  |
| Harford                  | 2006 | +              | +              | ?              | +              | -           | unclear              | Low nonresponse rate, but no information about differences between respondents and nonrespondents<br>Control for sociodemographic and behavioral characteristics                                                                                          |
| D'Amico                  | 2005 | +              | +              | +              | +              | +           | low                  | Substantial sample attrition over the 11-year period (70%), accounted for by weighting techniques that reduced attrition bias by 90%<br>Control for sociodemographic, family and deviance variables                                                       |
| Liem                     | 2001 | ?              | +              | ?              | +              | +           | unclear              | Unclear information about inclusion/exclusion criteria<br>No information about attrition<br>Control for sociodemographic and family variables                                                                                                             |
| Obot                     | 2000 | ?              | +              | ?              | +              | -           | unclear              | 5 matched controls per case? Unclear information<br>Low risk of detection bias regarding self-reported data<br>No information about response rate<br>Control for sociodemographic variables only                                                          |
| Obot                     | 1999 | ?              | +              | ?              | +              | -           | unclear              | No indication about the number of matched controls per case<br>Low risk of detection bias regarding self-reported data<br>No information about response rate<br>Control for sociodemographic variables only                                               |



| First author (reference) | Year  | Selection bias | Detection bias | Attrition bias | Reporting bias | Confounding | Overall risk of bias | Comments                                                                                                                                                                                                                                                                     |
|--------------------------|-------|----------------|----------------|----------------|----------------|-------------|----------------------|------------------------------------------------------------------------------------------------------------------------------------------------------------------------------------------------------------------------------------------------------------------------------|
| Obot                     | 1999b | ?              | +              | ?              | +              | -           | unclear              | No indication about the number of matched controls per case<br>Low risk of detection bias regarding self-reported data<br>No information about response rate<br>Control for sociodemographic variables only                                                                  |
| Crum                     | 1998  | +              | +              | -              | +              | -           | high                 | Study population drawn from a specific community, independent and confounding variables measured in 1966-1967<br>Acceptable but differential loss to follow-up (23%): non-participants more likely to be poor and to have dropped out of school<br>Control for gender only   |
| Gfoerer                  | 1997  | ?              | +              | ?              | +              | -           | unclear              | Unclear information about inclusion/exclusion criteria, gender<br>Low risk of detection bias regarding self-reported data<br>Response rate of 83%, no information about differences between participants and non-participants<br>Control for sociodemographic variables only |
| Tresidder                | 1997  | ?              | +              | -              | +              | -           | high                 | Representativeness unclear, but difficult to estimate considering the target population<br>Low risk of detection bias regarding self-reported data<br>Very low response rate: 17%<br>Control for gender and method of recruitment respectively                               |
